# Supplementary material for: Circulation long non-coding RNAs act as biomarkers for predicting tumorigenesis and metastasis in hepatocellular carcinoma
Source: PubMed Central journal article supplement (PMC4414207; doi:10.18632/oncotarget.2934), 2015-02-25
Supplement: oncotarget-06-4505-s001.pdf [file oncotarget-06-4505-s001.pdf]

## SUPPLEMENTARY MATERIALS AND METHODS

### LNCRNA EXPRESSION MICROARRAY DETECTION AND DATA ANALYSIS

Agilent Feature Extraction software (version 11.0.1.1) was used to analyse acquired array images. Quantile normalization and subsequent data processing were performed using the GeneSpring GX v12.0 software package (Agilent Technologies). After quantile normalization of the raw data, LncRNAs that at least 3 out of 9 samples have flags in present or marginal (“All Targets Value”) were chosen for further data analysis. Differentially expressed LncRNAs with statistical significance between the two groups were identified through Volcano Plot filtering. Finally, Hierarchical Clustering was performed to show the distinguishable LncRNAs expression pattern among samples.

#### Risk score analysis

Risk score analysis was performed to evaluate the associations between the concentrations of the plasma lncRNA expression levels. The upper 95% reference

interval of each lncRNA value in controls or non-metastasis group was set as the threshold to code the expression level of the corresponding lncRNA for each sample as 0 and 1 in the training set. A risk score function (RSF) to predict HCC or metastasis group was defined according to a linear combination of the expression level for each lncRNA. For example, the RSF for sample  $i$  using information from three lncRNAs was:  $rsfi = \sum_j W_j \cdot sij$ . In the above equation,  $sij$  is the risk score for lncRNA  $j$  on sample  $i$ , and  $W_j$  is the weight of the risk score of lncRNA  $j$ . The risk score of three lncRNAs was calculated using the weight by the regression coefficient that was derived from the univariate logistic regression analysis of each lncRNAs. Samples were ranked according to their RSF and then divided into a high-risk group, representing the predicted HCC cases or metastasis patients, and a low-risk group, representing the predicted control individuals or non-metastasis patients. Frequency tables and ROC curves were then used to evaluate the diagnostic effects of the profiling and to find the appropriate cutoff point, and to validate the procedure and cutoffs in the next validation sample set.

SUPPLEMENTARY FIGURES AND TABLES

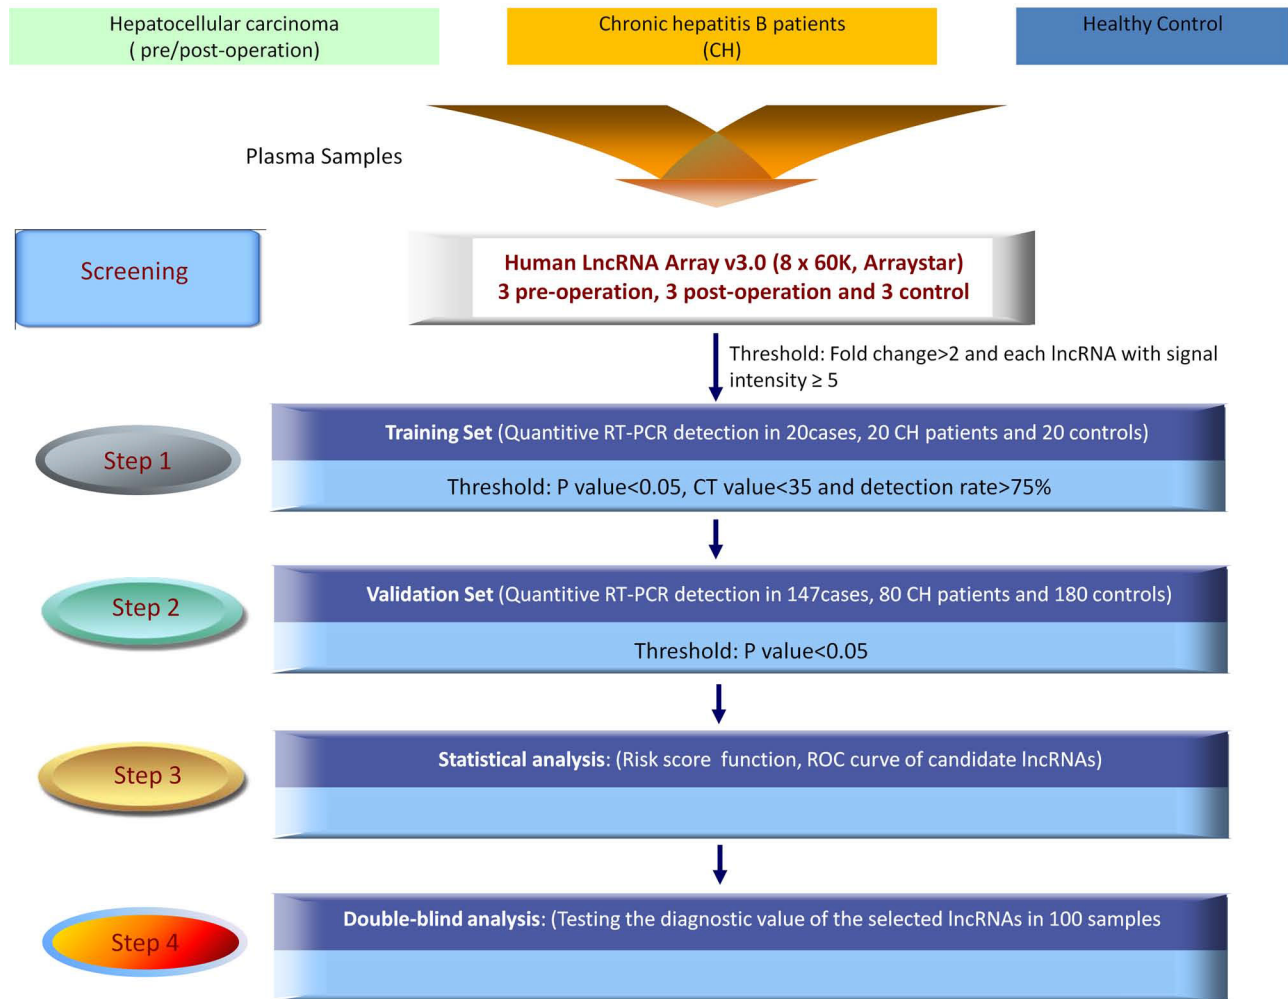

Supplementary Figure S1: Overview of the work design in biomarker screen for the diagnosis of HCC.

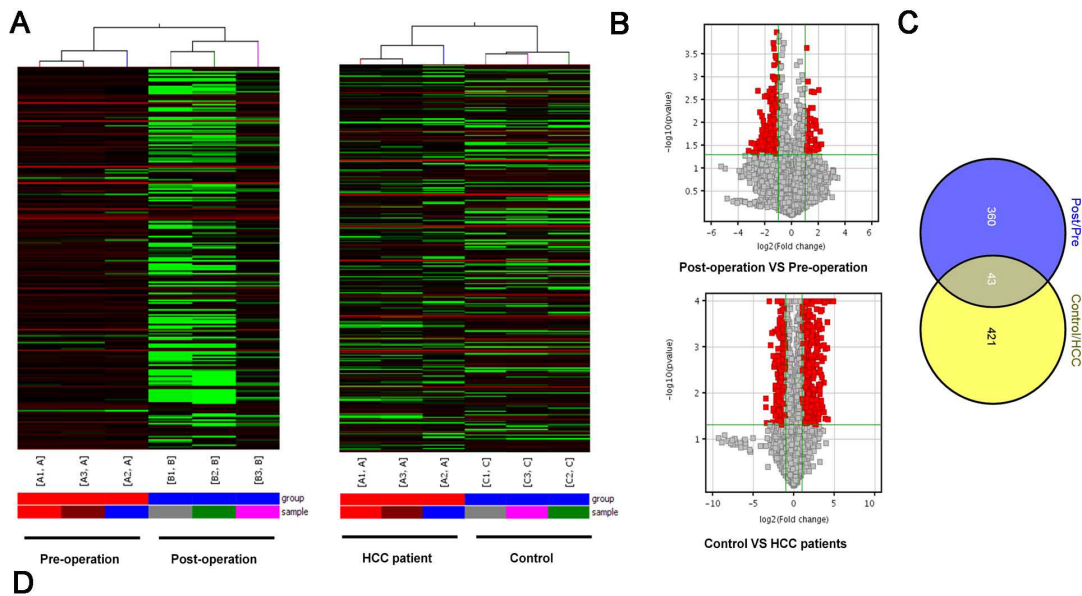

Common elements in "Post/Pre" and "Control/HCC":

| seqname                   | ProbeName     | [A1] (raw) | [A2] (raw) | [A3] (raw) | [B1] (raw) | [B2] (raw) | [B3] (raw) | [C1] (raw) | [C2] (raw) | [C3] (raw) |
|---------------------------|---------------|------------|------------|------------|------------|------------|------------|------------|------------|------------|
| ENST00000545254           | ASHGASP026619 | 106.4653   | 93.01934   | 112.5689   | 5.211182   | 19.15113   | 110.9648   | 25.08888   | 29.54317   | 33.42484   |
| NR_033905                 | ASHGASP019437 | 33.54419   | 22.43648   | 33.78111   | 5.058322   | 6.500741   | 22.3171    | 6.425284   | 5.915247   | 10.50696   |
| ENST00000435996           | ASHGASP053326 | 506.2274   | 212.9809   | 493.5091   | 19.38085   | 51.77796   | 352.7687   | 86.27879   | 98.49406   | 95.37294   |
| TCOIS_00001047            | ASHGASP045206 | 56.576355  | 21.261923  | 50.13768   | 4.9999995  | 7.6225123  | 18.58892   | 9.825793   | 6.4726553  | 7.0313096  |
| HMI1ncRNA1314-            | ASHGASP023657 | 73.07117   | 34.859196  | 68.43905   | 4.9999995  | 6.678862   | 47.018753  | 16.094     | 18.96585   | 7.27399    |
| ENST00000528139           | ASHGASP044802 | 68.0651    | 36.29069   | 65.81077   | 5.007215   | 17.32147   | 49.09662   | 13.08881   | 6.488891   | 9.173887   |
| ENST00000450503           | ASHGASP038133 | 97.588642  | 12.818281  | 26.113565  | 4.9999995  | 6.8232074  | 19.28161   | 4.9999995  | 4.9999995  | 7.226889   |
| uc003jss.d.1              | ASHGASP040455 | 56.197895  | 20.980192  | 47.20057   | 5.227181   | 7.92679    | 32.7777    | 4.9999995  | 6.364204   | 8.764888   |
| ENST00000422108           | ASHGASP015632 | 36.376976  | 23.034508  | 35.935856  | 5.442384   | 7.5423336  | 22.12846   | 4.9999995  | 7.739888   | 5.292424   |
| ENST00000561181           | ASHGASP022705 | 35.93189   | 11.123838  | 29.168228  | 4.9999995  | 6.500975   | 24.49001   | 4.9999995  | 7.114365   | 4.9999995  |
| TCOIS_00020616            | ASHGASP057673 | 31.094194  | 21.716866  | 33.5137    | 5.098104   | 7.1547365  | 24.013329  | 7.756229   | 4.9999995  | 6.8607106  |
| TCOIS_00026233            | ASHGASP036830 | 62.90411   | 27.259951  | 82.44051   | 5.2578597  | 8.009199   | 30.408567  | 7.717275   | 4.9999995  | 10.09679   |
| ENST00000419983           | ASHGASP015406 | 118.8226   | 37.92808   | 118.5329   | 5.007215   | 17.32147   | 49.09662   | 5.473594   | 17.43008   | 7.382277   |
| TCOIS_00027298            | ASHGASP036155 | 35.63867   | 33.013535  | 40.53198   | 5.407441   | 7.534977   | 26.332687  | 4.9999995  | 5.524394   | 4.9999995  |
| TCOIS_00020424            | ASHGASP041842 | 62.37462   | 25.69455   | 61.97341   | 5.019106   | 7.42667    | 44.29819   | 7.480561   | 9.26018    | 6.427513   |
| uc003anf.2                | ASHGASP018420 | 51.5182    | 33.28681   | 41.26122   | 5.036707   | 7.482239   | 36.69276   | 11.59338   | 8.871861   | 6.282064   |
| TCOIS_00029527            | ASHGASP032219 | 76.37541   | 29.08278   | 76.52879   | 5.250009   | 12.46773   | 39.33324   | 16.02031   | 15.72527   | 7.654149   |
| ENST00000544557           | ASHGASP021921 | 37.50307   | 29.3238    | 34.81741   | 5.007444   | 7.723389   | 34.22229   | 12.32377   | 7.623465   | 6.551936   |
| ENST00000413791           | ASHGASP035101 | 73.53163   | 36.66718   | 81.30029   | 5.772625   | 9.263873   | 39.00427   | 13.5352    | 12.43956   | 16.25209   |
| uc001bbe.1                | ASHGASP030061 | 97.96878   | 13.395019  | 31.007874  | 4.9999995  | 7.764559   | 23.230122  | 8.393821   | 4.9999995  | 4.9999995  |
| ENST00000525992           | ASHGASP055170 | 59.80021   | 26.052486  | 83.028244  | 4.9999995  | 7.265597   | 28.117723  | 7.300884   | 10.73325   | 15.48507   |
| NR_047694                 | ASHGASP025988 | 47.92929   | 41.85647   | 41.793377  | 5.1225405  | 7.071056   | 28.660076  | 8.729898   | 4.9999995  | 14.05652   |
| NR_038205                 | ASHGASP025808 | 40.126987  | 41.55739   | 35.960419  | 5.0579114  | 8.286993   | 28.841452  | 10.82943   | 9.843557   | 4.9999995  |
| ENST00000521139           | ASHGASP052699 | 56.902077  | 39.132324  | 53.509373  | 6.351606   | 7.23032    | 23.44439   | 4.9999995  | 4.9999995  | 7.417493   |
| ENST00000532280           | ASHGASP053657 | 44.424894  | 28.646126  | 42.542658  | 4.9999995  | 7.1277194  | 37.461826  | 7.7106357  | 14.52451   | 4.9999995  |
| ENST00000560760           | ASHGASP030182 | 24.916319  | 14.392083  | 25.181978  | 4.9999995  | 6.168501   | 25.364439  | 5.8404217  | 4.9999995  | 4.9999995  |
| ENST00000453795           | ASHGASP018460 | 44.10294   | 23.878788  | 51.609226  | 4.9999995  | 7.8330164  | 36.83131   | 8.711324   | 14.193188  | 5.388711   |
| ENST00000596000           | ASHGASP022611 | 34.09443   | 20.415264  | 30.724891  | 4.9999995  | 5.801441   | 31.433392  | 4.9999995  | 5.973521   | 8.586274   |
| TCOIS_00029855            | ASHGASP055559 | 101.54649  | 54.17835   | 104.6779   | 4.9999995  | 8.525135   | 53.35846   | 5.658084   | 6.2729287  | 4.9999995  |
| TCOIS_00025722            | ASHGASP058046 | 60.7939    | 15.171118  | 61.126774  | 4.9999995  | 5.1577597  | 22.378363  | 5.0315285  | 4.9999995  | 6.837971   |
| uc001bhw.2                | ASHGASP058327 | 55.80721   | 31.75638   | 50.895     | 5.012855   | 7.362521   | 37.10664   | 13.43567   | 6.269689   | 11.5174    |
| ENST00000421637           | ASHGASP038049 | 97.194016  | 14.58832   | 36.803825  | 4.9999995  | 6.3718905  | 22.848969  | 7.2154493  | 4.9999995  | 4.9999995  |
| ENST00000566418           | ASHGASP028028 | 44.97146   | 23.943048  | 42.43475   | 4.9999995  | 6.2795234  | 38.4791    | 7.8044415  | 9.729777   | 5.557211   |
| uc003fza.3                | ASHGASP058419 | 25.01944   | 28.694766  | 27.510908  | 4.9999995  | 5.7956004  | 18.684792  | 4.9999995  | 6.433593   | 4.9999995  |
| NR_024594                 | ASHGASP037084 | 158.75319  | 24.513187  | 138.7779   | 4.9999995  | 6.843428   | 42.357914  | 8.838197   | 14.206752  | 16.04173   |
| NR_024594                 | ASHGASP037084 | 158.75319  | 24.513187  | 138.7779   | 4.9999995  | 6.843428   | 42.357914  | 8.838197   | 14.206752  | 16.04173   |
| ENST00000431981           | ASHGASP045701 | 75.21143   | 21.697845  | 72.6581    | 5.119525   | 6.17952    | 25.081114  | 4.9999995  | 4.9999995  | 4.9999995  |
| NR_038429                 | ASHGASP017167 | 71.72874   | 15.613947  | 62.682415  | 4.9999995  | 6.731358   | 22.131159  | 4.9999995  | 4.9999995  | 4.9999995  |
| uc002ain.1                | ASHGASP030082 | 68.36105   | 42.853743  | 74.693504  | 4.9999995  | 8.834697   | 22.509003  | 4.9999995  | 16.25861   | 8.317313   |
| ENST00000493521           | ASHGASP018917 | 103.25588  | 19.038046  | 88.98173   | 5.1491146  | 6.2427444  | 18.51409   | 11.94445   | 8.239752   | 4.9999995  |
| chr7:149967450-150001750+ | ASHGASP000496 | 166.7526   | 57.5431    | 104.5749   | 5.042036   | 18.17793   | 35.29108   | 16.44231   | 12.56438   | 16.3757    |
| NR_046358                 | ASHGASP014779 | 74.97426   | 72.00106   | 67.33324   | 5.013899   | 6.806393   | 66.83796   | 16.8646    | 19.87151   | 12.11475   |

**Supplementary Figure S2: Schematic representation of the lncRNA microarray assay.** Samples were obtained from three patients with HCC before operation and the corresponding plasma after operation as well as three cancer-free controls. (A) Hierarchical clustering analysis was applied for analysis the different expressed lncRNA in patients' plasma before and after operation (left panel). A case-control study was also conducted (right panel). (B) Volcano plot distribution was used to sort the aberrantly expressed lncRNAs between the pre-operation and post-operation group as well as the HCC group and the control group. (C) The up-regulated lncRNA transcripts in HCC patients with the decreased lncRNA transcripts in HCC patients post-operation were merged, and finally obtained 43 lncRNA transcripts. (D) All the 43 deregulated transcripts were filtered by high signal intensity ( $\geq 5$ ) and at least 2-fold deregulation which yielded 13 lncRNA candidates highlighted.

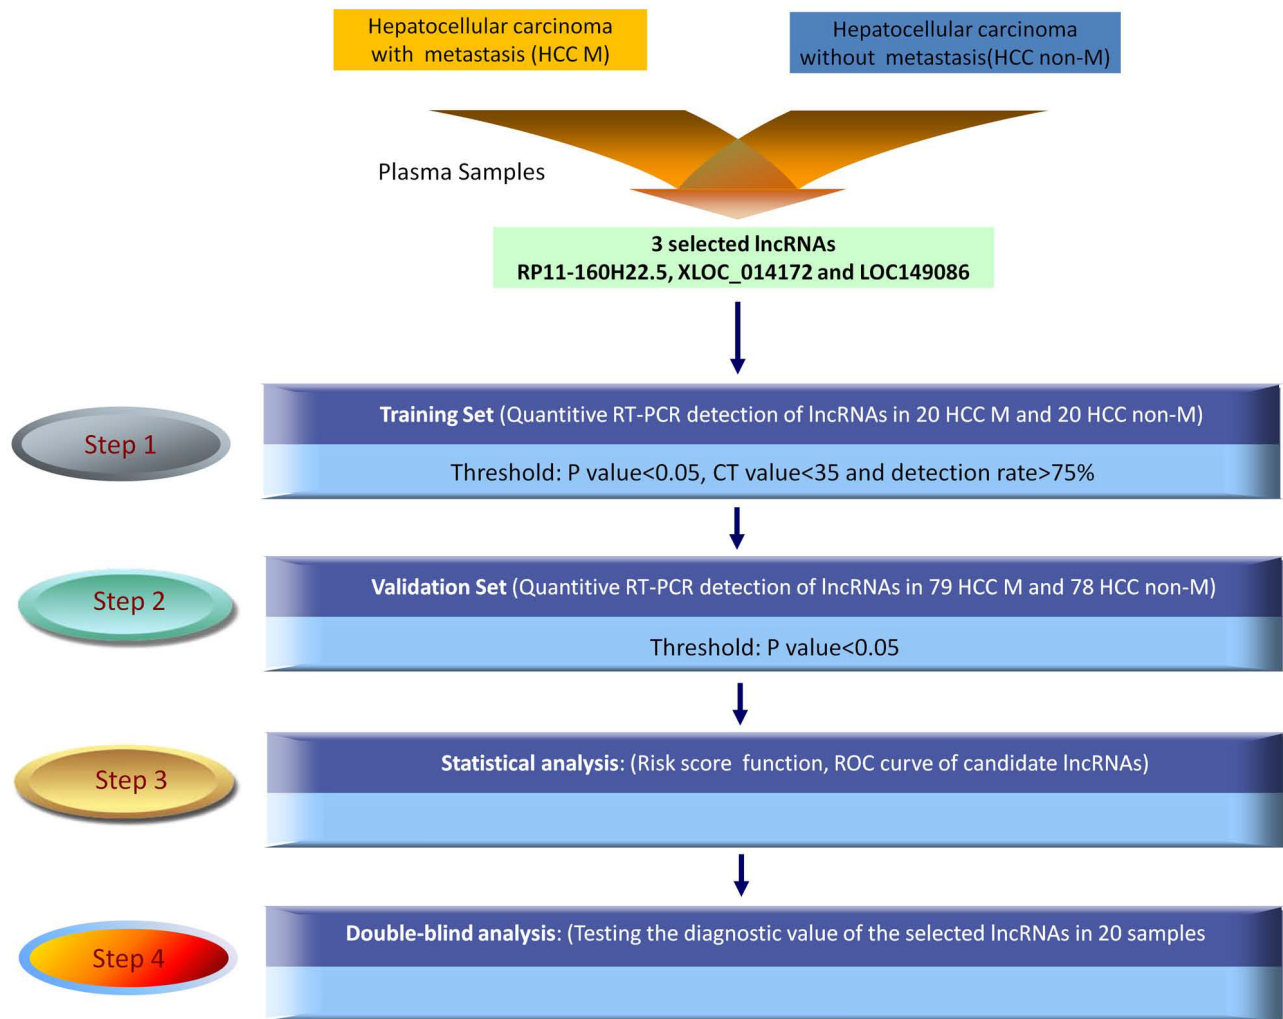

Supplementary Figure S3: Overview of the work design in potential biomarker screening for the metastasis of HCC.

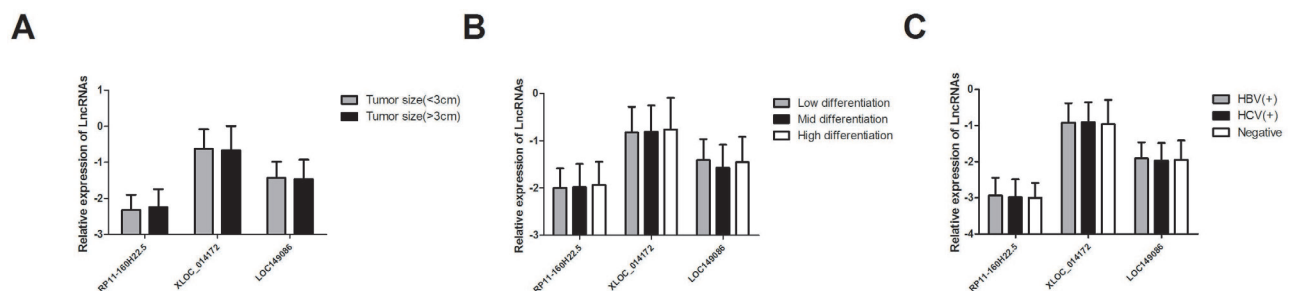

Supplementary Figure S4: Relative expression level of three lncRNAs in subgroup of HCC. (A) HCC patients were divided into two groups according to the size of the tumor (3 cm as cutoff). (B) Patients were grouped by the differentiation of tumor according to the pathological diagnosis. (C) The sectionalization was based on the virus infection of patients detected clinically including HBV, HCV and no virus infection. Data was presented as mean ± SEM and was analyzed with student *t* test. No significant difference was obtained in subgroup.

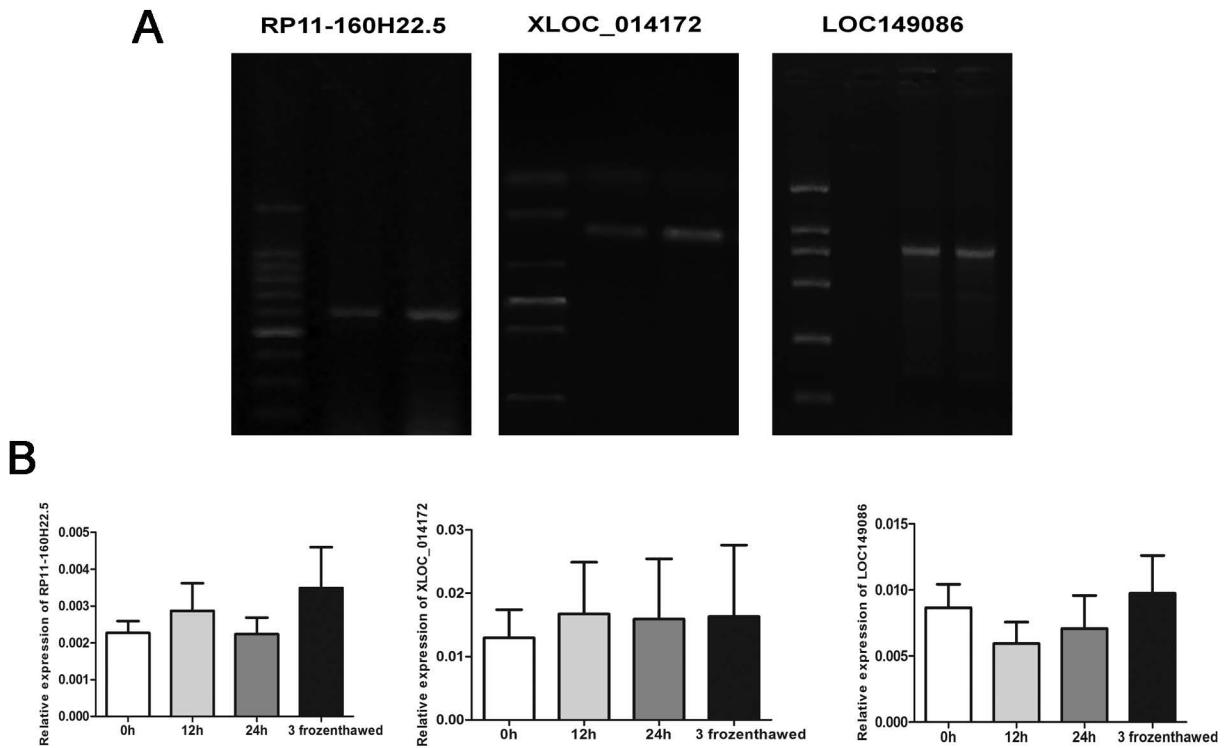

**Supplementary Figure S5: Stability detection of endogenous lncRNAs in human plasma.** (A) The products of the amplification fragment were detected by agarose electrophoresis. (B) RT-qPCR was applied for detecting the expression level of the three lncRNAs. Human plasmas obtained from three healthy controls were incubated at room temperature for 12 h, 24 h or subjected to up to 3 cycles of freezing and thawing. Data was presented as mean ± SEM. No significant difference was observed in each group.

**Supplementary Table S1: LncRNA expression levels in hepatocellular carcinoma HCC and cancer-free control plasma samples in the training and validation sets**

| lncRNA        | Training set         |                        |                       | Validation set        |                        |                       |
|---------------|----------------------|------------------------|-----------------------|-----------------------|------------------------|-----------------------|
|               | HCC                  | Control                | <i>P</i> <sup>b</sup> | HCC                   | Control                | <i>P</i> <sup>b</sup> |
| N             | 20                   | 20                     |                       | 147                   | 180                    |                       |
| RP11-160H22.5 | 0.014 (0.0089–0.028) | 0.0025 (0.0019–0.0045) | $3.18 \times 10^{-7}$ | 0.0082 (0.0043–0.019) | 0.0033 (0.0011–0.012)  | $8.90 \times 10^{-8}$ |
| XLOC_014172   | 0.047 (0.1305–0.183) | 0.0072 (0.0040–0.020)  | $4.87 \times 10^{-7}$ | 0.088 (0.076–0.13)    | 0.0013 (0.00012–0.012) | $< 1 \times 10^{-10}$ |
| LOC149086     | 0.052 (0.016–1.00)   | 0.0049 (0.0031–0.010)  | $4.22 \times 10^{-7}$ | 0.021 (0.013–0.049)   | 0.0046 (0.0019–0.018)  | $< 1 \times 10^{-10}$ |

<sup>a</sup>Data are expressed as the median (interquartile range).

<sup>b</sup>Wilcoxon rank sum test.

**Supplementary Table S2: LncRNA expression levels in hepatocellular carcinoma(HCC) metastasis and non-metastasis patients' plasma samples in the training and validation sets**

| lncRNA      | Training set            |                        |                       | Validation set         |                        |                       |
|-------------|-------------------------|------------------------|-----------------------|------------------------|------------------------|-----------------------|
|             | Metastasis              | Non-metastasis         | <i>P</i> <sup>b</sup> | Metastasis             | Non-metastasis         | <i>P</i> <sup>b</sup> |
| N           | 20                      | 20                     |                       | 79                     | 78                     |                       |
| XLOC_014172 | 0.13<br>(0.10–0.96)     | 0.082<br>(0.076–0.089) | 0.0006                | 0.27<br>(0.12–0.70)    | 0.017<br>(0.012–0.037) | $< 1 \times 10^{-10}$ |
| LOC149086   | 0.04589<br>(0.028–0.18) | 0.020<br>(0.013–0.035) | 0.03                  | 0.019<br>(0.014–0.039) | 0.016<br>(0.011–0.037) | 0.006                 |

<sup>a</sup>Data are expressed as the median (interquartile range).

<sup>b</sup>Wilcoxon rank sum test.

**Supplementary Table S3: LncRNA expression levels during perioperation period in hepatocellular carcinoma HCC patients' plasma samples**

|               | Pre-operation <sup>a</sup> (N = 217) | Post-operation <sup>a</sup> (N = 217) | Fold change | <i>P</i> value <sup>b</sup> |
|---------------|--------------------------------------|---------------------------------------|-------------|-----------------------------|
| RP11-160H22.5 | 0.011(0.0061–0.023)                  | 0.0023(0.00083–0.0072)                | 4.78        | $< 1 \times 10^{-10}$       |
| XLOC_014172   | 0.092(0.076–0.15)                    | 0.011(0.00029–0.022)                  | 8.36        | $< 1 \times 10^{-10}$       |
| LOC149086     | 0.020 (0.014–0.054)                  | 0.0025 (0.00077–0.0099)               | 8.00        | $< 1 \times 10^{-10}$       |

<sup>a</sup>Data are expressed as the median (interquartile range).

<sup>b</sup>Wilcoxon rank sum test.

**Supplementary Table S4: Correlation analysis between lncRNAs expression level variation and the metastasis**

|               |                | Increased (N) | Decreased (N) | <i>P</i> value <sup>a</sup> |
|---------------|----------------|---------------|---------------|-----------------------------|
| RP11-160H22.5 | Metastasis     | 57            | 52            | $< 0.001$                   |
|               | Non-metastasis | 2             | 106           |                             |
| XLOC_014172   | Metastasis     | 3             | 106           | 0.041                       |
|               | Non-metastasis | 0             | 108           |                             |
| LOC149086     | Metastasis     | 31            | 78            | $< 0.001$                   |
|               | Non-metastasis | 5             | 103           |                             |

<sup>a</sup>Chi-square test.
